# Supplementary material for: WIKI4, a Novel Inhibitor of Tankyrase and Wnt/ß-Catenin Signaling
Source: PubMed Central journal article supplement (PMC3515623; doi:10.1371/journal.pone.0050457), 2012-12-05

A.

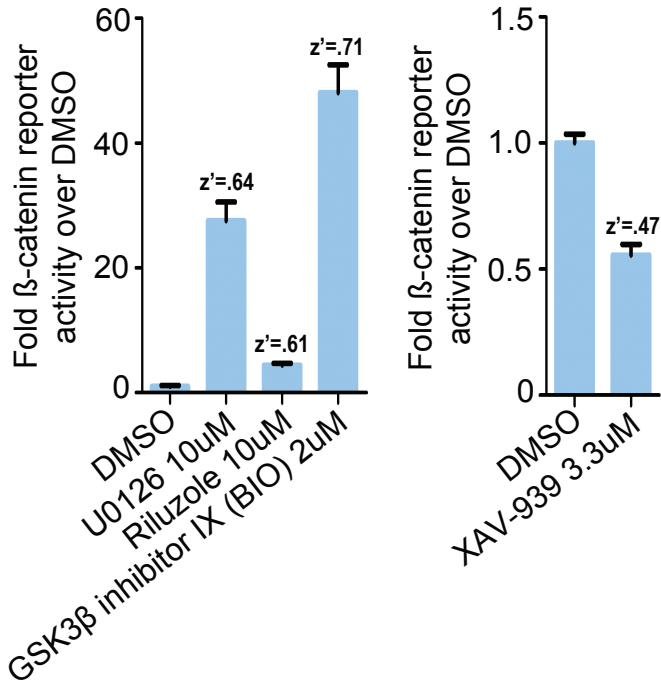

B.

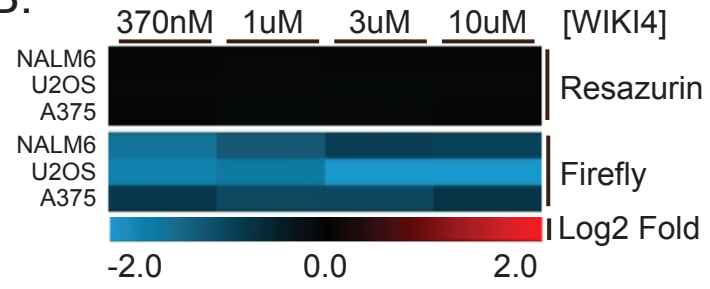

C.

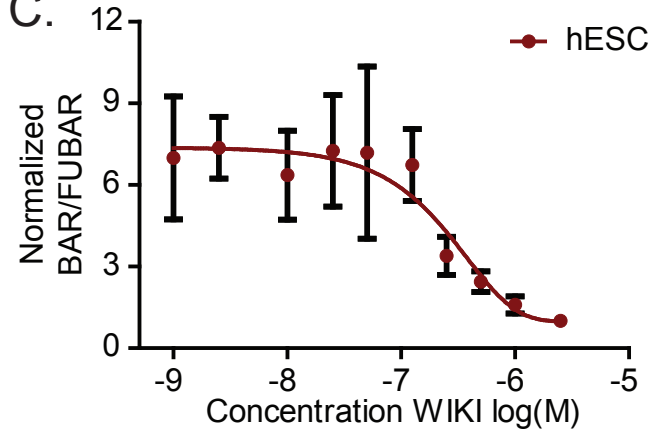

D.

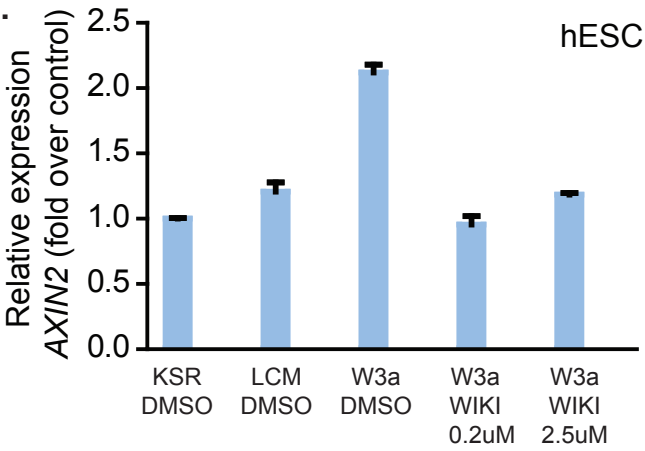

E.

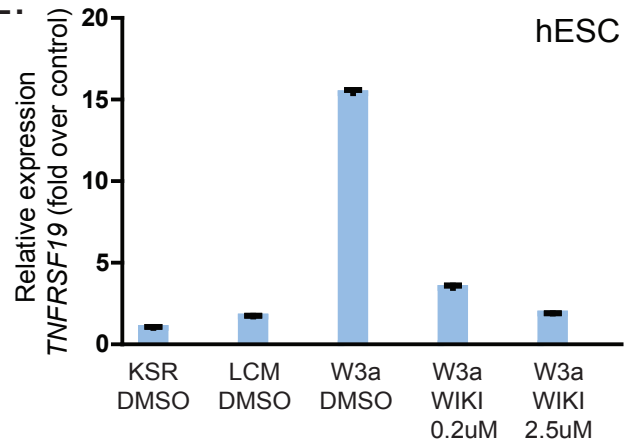

Supplement: pone.0050457.s001.pdf [file pone.0050457.s001.pdf]
