# Supplementary material for: WIKI4, a Novel Inhibitor of Tankyrase and Wnt/ß-Catenin Signaling
Source: PubMed Central journal article supplement (PMC3515623; doi:10.1371/journal.pone.0050457), 2012-12-05

**A.** DLD1 colorectal cancer cells

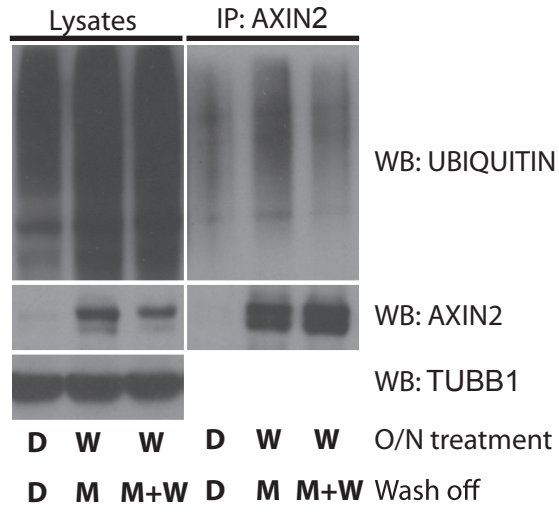

**B.** DLD1 colorectal cancer cells

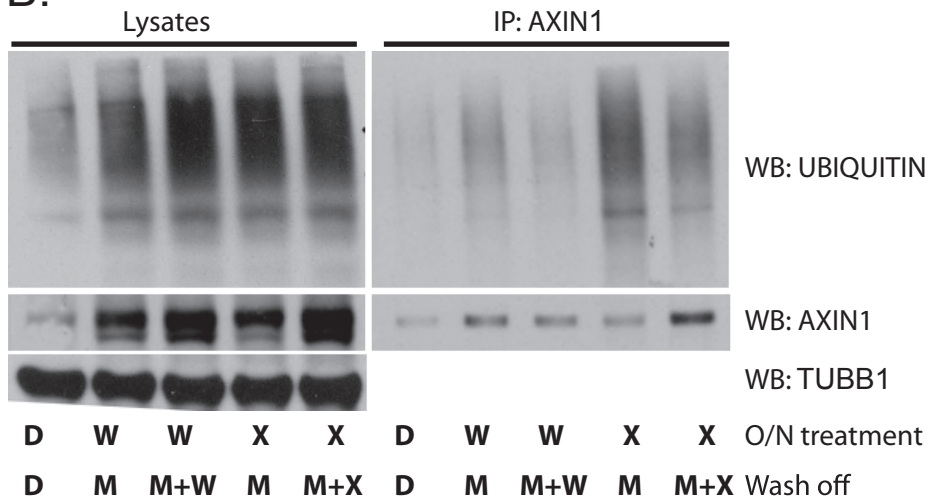

Supplement: pone.0050457.s003.pdf [file pone.0050457.s003.pdf]
